# Supplementary material
Source: PubMed Central journal article supplement (PMC4246014)
Supplement: NIHMS633712-supplement-Supplementary_Table_1.pdf [file NIHMS633712-supplement-Supplementary_Table_1.pdf]

**Supplementary Table 1.** mRNA transcripts evaluated by qPCR.

| <b>Gene</b> | <b>RefSeq</b> | <b>Name</b>                                                            |
|-------------|---------------|------------------------------------------------------------------------|
| Acat1       | NM_017075     | Acetyl-coenzyme A acetyltransferase 1                                  |
| Actb        | NM_031144     | Actin, beta                                                            |
| Agpat6      | NM_001047849  | 1-acylglycerol-3-phosphate O-acyltransferase 6, GPAT4                  |
| Alox5       | NM_012822     | 5-LOX, Arachidonate 5-lipoxygenase                                     |
| Apoe        | NM_138828     | Apolipoprotein E                                                       |
| Atg16l1     | NM_001108809  | ATG16 autophagy related 16-like 1 (S. cerevisiae)                      |
| Atg5        | NM_001014250  | ATG5 autophagy related 5 homolog (S. cerevisiae)                       |
| Atgl        | NM_001108509  | Adipose Triglyceride Lipase                                            |
| Becn1       | NM_053739     | Beclin 1, autophagy related                                            |
| Cd11b       | NM_012711     | Integrin, alpha M                                                      |
| Cd168       | NM_012964     | Hyaluronan mediated motility receptor (RHAMM)                          |
| Cd68        | NM_001031638  | Cd68 molecule                                                          |
| Cebpa       | NM_012524     | CCAAT/enhancer binding protein (C/EBP), alpha                          |
| Cgi58       | NM_212524     | Abhydrolase domain containing 5                                        |
| Col1a2      | NM_053356     | Collagen, type I, alpha 2                                              |
| Cox1        | NM_017043     | Prostaglandin-endoperoxide synthase 1                                  |
| Cox2        | NM_017232     | Prostaglandin-endoperoxide synthase 2                                  |
| Dgat1       | NM_053437     | Diacylglycerol O-acyltransferase homolog 1 (mouse)                     |
| eMHC        | NM_012604     | Myosin, heavy chain 3, skeletal muscle, embryonic                      |
| Emr1        | NM_001007557  | EGF-like module containing, mucin-like, hormone receptor-like 1, F4/80 |
| Fat/Cd36    | XM_575338     | Similar to fatty acid translocase/CD36                                 |
| Fbxo32      | NM_133521     | Atrogin-1                                                              |
| Fitm1       | NM_001106037  | Fat storage-inducing transmembrane protein 1                           |
| Fitm2       | NM_001107799  | Fat storage-inducing transmembrane protein 2                           |
| Fsp1        | NM_012618     | S100 calcium-binding protein A4                                        |
| Fsp27       | NM_001024333  | Cell death-inducing DFFA-like effector c                               |
| Il10        | NM_012854     | Interleukin 10                                                         |
| Il1b        | NM_031512     | Interleukin 1 beta                                                     |
| Il6         | NM_012589     | Interleukin 6                                                          |
| Mmp2        | NM_031054     | Matrix metalloproteinase 2                                             |
| Mmp3        | NM_133523     | Matrix metalloproteinase 3                                             |
| Mmp8        | NM_022221     | Matrix metalloproteinase 8                                             |
| Mmp9        | NM_031055     | Matrix metalloproteinase 9                                             |
| Mmp13       | NM_133530     | Matrix metalloproteinase 13                                            |
| Mmp14       | NM_031056     | Matrix metalloproteinase 14 (membrane-inserted)                        |
| Pdgfra      | NM_012802     | Platelet derived growth factor receptor, alpha polypeptide             |
| Pld1        | NM_030992     | Phospholipase D1                                                       |
| Plin        | NM_013094     | Perilipin 1                                                            |
| Plin5       | NM_001134637  | Perilipin 5                                                            |
| Pparg       | NM_013124     | Peroxisome proliferator-activated receptor gamma                       |
| Scx         | NM_001130508  | Scleraxis                                                              |
| Timp1       | NM_053819     | TIMP metalloproteinase inhibitor 1                                     |
| Timp2       | NM_021989     | TIMP metalloproteinase inhibitor 2                                     |
| Tnmd        | NM_022290     | Tenomodulin                                                            |
| Trim63      | NM_080903     | MuRF-1, Tripartite motif-containing 63                                 |
| Vps34       | NM_022958     | Phosphoinositide-3-kinase, class 3                                     |
